# Supplementary material for: Mutational Spectrum of the ABCA12 Gene and Genotype–Phenotype Correlation in a Cohort of 64 Patients with Autosomal Recessive Congenital Ichthyosis
Source: MDPI journal article supplement (doi:10.3390/genes14030717), 2023-03-15
Supplement: s1 [file s1]

Supp. Table S1: classification of the novel mutations in *ABCA12*

| Mutation           |                    | gnomAD                      | ClinVar                   | ACMG classification                    |
|--------------------|--------------------|-----------------------------|---------------------------|----------------------------------------|
| c.70-2A>G          | p.?                | n/a                         | n/a                       | pathogenic (PVS1, PM2, PM3, PP3)       |
| c.646_647del       | p.(Thr216Profs*19) | n/a                         | n/a                       | pathogenic (PVS1, PM2, PM3)            |
| c.1221dup          | p.(Ser408Ilefs*9)  | n/a                         | n/a                       | pathogenic (PVS1, PM2, PM3)            |
| c.1792_1801del     | p.(Gln598Glyfs*14) | n/a                         | n/a                       | pathogenic (PVS1, PM2, PM3)            |
| c.2194C>T          | p.(Gln732*)        | n/a                         | n/a                       | pathogenic (PVS1, PM2, PM3)            |
| c.2251_2252delinsT | p.(Gly751Serfs*8)  | n/a                         | n/a                       | pathogenic (PVS1, PM2, PM3)            |
| c.2341T>A          | p.(Cys781Ser)      | n/a                         | n/a                       | likely pathogenic (PM1, PM2, PM3, PP3) |
| c.2486dup          | p.(Arg830Glufs*16) | n/a                         | n/a                       | pathogenic (PVS1, PM2, PM3)            |
| c.2509del          | p.(Glu837Lysfs*14) | n/a                         | n/a                       | likely pathogenic (PVS1, PM2, PM3)     |
| c.2968A>G          | p.(Lys990Glu)      | n/a                         | 1x uncertain significance | likely pathogenic (PM1, PM2, PM3, PP3) |
| c.2972_2988del     | p.(Thr991Lysfs*31) | n/a                         | n/a                       | pathogenic (PVS1, PM2, PM3)            |
| c.3260dup          | p.(Leu1088Alafs*4) | n/a                         | n/a                       | pathogenic (PVS1, PM2, PM3)            |
| c.3276del          | p.(Asp1093Thrfs*8) | n/a                         | n/a                       | pathogenic (PVS1, PM2, PM3)            |
| c.3452T>A          | p.(Phe1151Tyr)     | 0x homo, 3x het, MAF 0.001% | n/a                       | likely pathogenic (PM1, PM2, PM3, PP3) |
| c.3758T>C          | p.(Leu1253Pro)     | n/a                         | n/a                       | likely pathogenic (PM1, PM2, PM3, PP3) |
| c.3829+3A>G        | p.?                | n/a                         | n/a                       | likely pathogenic (PM2, PM3, PP3)      |

|                |                     |                                 |               |                                        |
|----------------|---------------------|---------------------------------|---------------|----------------------------------------|
| c.3977del      | p.(Ser1326Ilefs*41) |                                 | n/a           | pathogenic (PVS1, PM2, PM3)            |
| c.4412A>G      | p.(His1471Arg)      | 0x homo, 2x het, MAF<br>0.0007% | n/a           | likely pathogenic (PM1, PM2, PM3, PP3) |
| c.4468T>C      | p.(Ser1490Pro)      | n/a                             | n/a           | likely pathogenic (PM1, PM2, PM3, PP3) |
| c.4512_4515del | p.(Glu1504Aspfs*39) | n/a                             | n/a           | pathogenic (PVS1, PM2, PM3)            |
| c.4514C>T      | p.(Pro1505Leu)      | 0x homo, 1x het, MAF<br>0.0004% | n/a           | likely pathogenic (PM1, PM2, PM3, PP3) |
| c.4540C>T      | p.(Arg1514Cys)      | n/a                             | n/a           | pathogenic (PM1, PM2, PM3, PM5, PP3)   |
| c.4601C>T      | p.(Thr1534Met)      | 0x homo, 3x het, MAF 0.001%     | n/a           | likely pathogenic (PM1, PM2, PM3, PP3) |
| c.5046_5050del | p.(Lys1682Asnfs*13) | n/a                             | n/a           | pathogenic (PVS1, PM2, PM3)            |
| c.5787T>G      | p.(Tyr1929*)        | 0x homo, 2x het, MAF<br>0.0008% | 1x pathogenic | pathogenic (PVS1, PM2, PM3, PP5)       |
| c.5878C>T      | p.(Arg1960*)        | n/a                             | n/a           | pathogenic (PVS1, PM2, PM3)            |
| c.5939+1G>A    | p.?                 | 0x homo, 4x het, MAF 0.002%     | n/a           | pathogenic (PVS1, PM2, PM3, PP3)       |
| c.6356T>G      | p.(Val2119Gly)      |                                 |               | likely pathogenic (PM1, PM2, PM3, PP3) |
| c.6393G>T      | p.(Pro2131=)        | 0x homo, 6x het, MAF 0.002%     | n/a           | pathogenic (PVS1, PM2, PM3, PP3)       |
| c.6722_6723del | p.(Arg2241Ilefs*4)  | n/a                             | n/a           | pathogenic (PVS1, PM2, PM3)            |
| c.7006T>G      | p.(Cys2336Gly)      | n/a                             | n/a           | likely pathogenic (PM1, PM2, PM3, PP3) |
| c.7222C>T      | p.(Pro2408Ser)      | 0x homo, 1x het, MAF<br>0.0004% | n/a           | likely pathogenic (PM1, PM2, PM3, PP3) |
| c.7412G>C      | p.(Gly2471Ala)      | n/a                             | n/a           | likely pathogenic (PM1, PM2, PM3, PP3) |

|             |     |     |     |                                  |
|-------------|-----|-----|-----|----------------------------------|
| c.7437-2del | p.? | n/a | n/a | pathogenic (PVS1, PM2, PM3, PP3) |
|-------------|-----|-----|-----|----------------------------------|

n/a: not listed in the database. homo: homozygous. Het: heterozygous. MAF: minor allele frequency. -: not evaluated. wt: wildtype, mut: mutation. Scores are in brackets.

gnomAD: The Genome Aggregation Database version v2.1.1 (<http://gnomad.broadinstitute.org/>). The data set provided on this website spans 125,748 exome sequences and 15,708 whole-genome sequences from unrelated individuals sequenced as part of various disease-specific and population genetic studies.

ClinVar: Version december 2023 (<https://www.ncbi.nlm.nih.gov/clinvar/>).

ACMG: American College of Medical Genetics and Genomics, Richards et al. (2015).
